# Supplementary material for: Prognostication of patients with clear cell renal cell carcinomas based on quantification of DNA methylation levels of CpG island methylator phenotype marker genes
Source: PubMed Central journal article supplement (PMC4216836; doi:10.1186/1471-2407-14-772), 2014-10-20
Supplement: 12885_2014_4959_MOESM7_ESM.pdf [file 12885_2014_4959_MOESM7_ESM.pdf]

**Table S5.** Differences of DNA methylation levels at all examined 193 CpG units including 299 CpG sites of 14 CpG island methylator phenotype (CIMP) marker genes between CIMP-negative and CIMP-positive clear cell renal cell carcinomas (ccRCCs) in the learning cohort.

| ID of CpG unit | Gene symbol | Chromosome | Position of CpG site <sup>a</sup>      | DNA methylation level (%) (mean±SE) |                             | P value <sup>b</sup> |
|----------------|-------------|------------|----------------------------------------|-------------------------------------|-----------------------------|----------------------|
|                |             |            |                                        | CIMP-negative ccRCCs (n=88)         | CIMP-positive ccRCCs (n=14) |                      |
| 1              | FAM150A     | 8          | 58478309                               | 7.10±0.30                           | 16.90±3.40                  | <u>1.81E-05</u>      |
| 2              | FAM150A     | 8          | 58478316, 58478323                     | 5.30±0.30                           | 18.00±4.60                  | <u>7.71E-08</u>      |
| 3              | FAM150A     | 8          | 58478361, 58478363, 58478366           | 8.20±0.40                           | 22.90±4.20                  | <u>1.08E-06</u>      |
| 4              | FAM150A     | 8          | 58478376                               | 5.30±0.50                           | 15.30±2.70                  | <u>2.07E-06</u>      |
| 5              | FAM150A     | 8          | 58478396, 58478403                     | 13.70±0.50                          | 28.80±3.60                  | <u>1.83E-07</u>      |
| 6              | FAM150A     | 8          | 58478416                               | 41.60±2.50                          | 54.40±7.10                  | <u>3.61E-02</u>      |
| 7              | FAM150A     | 8          | 58478426, 58478428                     | 25.30±0.80                          | 45.20±3.90                  | <u>2.34E-07</u>      |
| 8              | FAM150A     | 8          | 58478477                               | 17.70±0.70                          | 37.60±3.10                  | <u>6.20E-08</u>      |
| 9              | FAM150A     | 8          | 58478496, 58478499                     | 16.60±0.60                          | 37.70±3.80                  | <u>2.21E-07</u>      |
| 10             | FAM150A     | 8          | 58478504                               | 2.20±0.40                           | 16.50±3.60                  | <u>9.96E-07</u>      |
| 11             | FAM150A     | 8          | 58478511                               | 17.70±0.70                          | 37.60±3.10                  | <u>6.20E-08</u>      |
| 12             | FAM150A     | 8          | 58478536                               | 3.30±0.40                           | 17.90±4.70                  | <u>4.05E-05</u>      |
| 13             | FAM150A     | 8          | 58478553                               | 10.20±0.80                          | 33.20±4.90                  | <u>1.41E-05</u>      |
| 14             | FAM150A     | 8          | 58478585, 58478588, 58478592           | 13.20±0.80                          | 31.80±4.20                  | <u>1.15E-06</u>      |
| 15             | FAM150A     | 8          | 58478616                               | 13.90±1.30                          | 41.00±5.10                  | <u>8.56E-06</u>      |
| 16             | FAM150A     | 8          | 58478624, 58478626                     | 16.60±0.60                          | 37.70±3.80                  | <u>2.21E-07</u>      |
| 17             | FAM150A     | 8          | 58478661                               | 8.30±0.50                           | 23.40±4.30                  | <u>5.02E-06</u>      |
| 18             | GRM6        | 5          | 178422320, 178422324                   | 10.10±0.77                          | 32.04±3.91                  | <u>1.37E-06</u>      |
| 19             | GRM6        | 5          | 178422375, 178422380                   | 8.63±0.37                           | 22.47±2.74                  | <u>2.29E-07</u>      |
| 20             | ZFP42       | 4          | 188916865, 188916867                   | 17.00±0.67                          | 32.55±3.30                  | <u>8.77E-06</u>      |
| 21             | ZFP42       | 4          | 188916875                              | 10.23±0.61                          | 25.67±2.90                  | <u>5.73E-07</u>      |
| 22             | ZFP42       | 4          | 188916899                              | 9.80±0.55                           | 26.83±3.83                  | <u>2.03E-07</u>      |
| 23             | ZFP42       | 4          | 188916913                              | 9.33±0.39                           | 24.31±3.27                  | <u>2.85E-07</u>      |
| 24             | ZFP42       | 4          | 188916943                              | 25.67±1.20                          | 46.69±3.90                  | <u>3.41E-06</u>      |
| 25             | ZFP42       | 4          | 188916982, 188916984                   | 20.67±0.98                          | 42.19±2.99                  | <u>2.28E-07</u>      |
| 26             | ZNF540      | 19         | 38042446                               | 46.15±1.15                          | 60.42±3.90                  | <u>1.00E-04</u>      |
| 27             | ZNF540      | 19         | 38042453                               | 30.51±1.66                          | 50.92±5.17                  | 6.64E-01             |
| 28             | ZNF540      | 19         | 38042472, 38042474                     | 15.26±0.77                          | 27.95±2.52                  | <u>3.03E-08</u>      |
| 29             | ZNF540      | 19         | 38042486                               | 30.51±1.66                          | 50.92±5.17                  | <u>2.11E-03</u>      |
| 30             | ZNF540      | 19         | 38042496                               | 23.81±1.53                          | 48.80±4.08                  | <u>3.22E-08</u>      |
| 31             | ZNF540      | 19         | 38042499, 38042501                     | 17.65±1.21                          | 36.03±4.88                  | <u>1.92E-06</u>      |
| 32             | ZNF540      | 19         | 38042518                               | 20.25±1.57                          | 44.45±2.75                  | <u>2.12E-07</u>      |
| 33             | ZNF540      | 19         | 38042530, 38042532                     | 21.48±1.17                          | 45.40±2.10                  | <u>7.60E-08</u>      |
| 34             | ZNF540      | 19         | 38042544, 38042552                     | 40.92±1.09                          | 55.75±2.86                  | <u>1.47E-05</u>      |
| 35             | ZNF540      | 19         | 38042564                               | 17.67±1.49                          | 38.33±6.96                  | <u>1.16E-03</u>      |
| 36             | ZNF540      | 19         | 38042576                               | 22.31±0.88                          | 35.92±3.35                  | <u>3.46E-07</u>      |
| 37             | ZNF540      | 19         | 38042593, 38042608                     | 40.68±1.65                          | 51.10±5.51                  | <u>1.24E-02</u>      |
| 38             | ZNF540      | 19         | 38042625                               | 24.31±1.57                          | 41.88±7.96                  | <u>1.64E-05</u>      |
| 39             | ZNF540      | 19         | 38042770, 38042774                     | 23.65±1.33                          | 40.90±4.46                  | <u>4.83E-07</u>      |
| 40             | ZNF540      | 19         | 38042782, 38042785                     | 21.63±1.16                          | 38.57±4.79                  | <u>2.96E-06</u>      |
| 41             | ZNF540      | 19         | 38042800, 38042802                     | 35.12±1.26                          | 57.15±4.62                  | <u>1.89E-08</u>      |
| 42             | ZNF540      | 19         | 38042816                               | 26.95±1.18                          | 48.07±5.15                  | <u>8.69E-05</u>      |
| 43             | ZNF154      | 19         | 58220567                               | 7.61±0.59                           | 30.67±5.37                  | <u>4.55E-08</u>      |
| 44             | ZNF154      | 19         | 58220627                               | 5.75±0.54                           | 32.93±5.47                  | <u>2.30E-08</u>      |
| 45             | ZNF154      | 19         | 58220657, 58220662                     | 10.37±0.69                          | 35.71±5.08                  | <u>3.67E-08</u>      |
| 46             | ZNF154      | 19         | 58220706                               | 10.67±0.67                          | 26.02±5.26                  | <u>8.10E-07</u>      |
| 47             | ZNF154      | 19         | 58220718                               | 14.70±1.10                          | 31.07±5.40                  | <u>9.78E-05</u>      |
| 48             | ZNF154      | 19         | 58220766, 58220773                     | 26.58±1.31                          | 50.31±3.96                  | <u>5.76E-07</u>      |
| 49             | RIMS4       | 20         | 43438319                               | 11.11±1.05                          | 20.86±3.40                  | <u>1.26E-03</u>      |
| 50             | RIMS4       | 20         | 43438335, 43438338                     | 16.56±0.84                          | 28.42±3.96                  | <u>2.80E-04</u>      |
| 51             | RIMS4       | 20         | 43438404, 43438406                     | 30.49±1.47                          | 52.19±4.11                  | <u>7.02E-06</u>      |
| 52             | RIMS4       | 20         | 43438421, 43438428, 43438430, 43438433 | 24.21±1.10                          | 41.31±4.04                  | <u>1.05E-05</u>      |

|     |         |    |                                            |            |            |                 |
|-----|---------|----|--------------------------------------------|------------|------------|-----------------|
| 53  | RIMS4   | 20 | 43438452                                   | 15.54±1.11 | 30.29±3.61 | <u>6.01E-05</u> |
| 54  | RIMS4   | 20 | 43438513                                   | 9.22±0.60  | 21.83±3.27 | <u>6.05E-06</u> |
| 55  | RIMS4   | 20 | 43438548, 43438550                         | 3.73±0.43  | 20.11±4.71 | <u>7.83E-05</u> |
| 56  | RIMS4   | 20 | 43438576                                   | 8.44±0.71  | 27.00±4.47 | <u>9.52E-07</u> |
| 57  | RIMS4   | 20 | 43438596                                   | 13.58±0.96 | 28.97±4.06 | <u>8.19E-06</u> |
| 58  | RIMS4   | 20 | 43438621                                   | 10.00±0.48 | 18.75±1.97 | <u>7.83E-07</u> |
| 59  | RIMS4   | 20 | 43438653                                   | 16.26±1.49 | 42.40±8.63 | <u>8.35E-03</u> |
| 60  | PCDHAC1 | 5  | 140305713                                  | 18.47±0.44 | 24.28±1.64 | <u>1.21E-04</u> |
| 61  | PCDHAC1 | 5  | 140305728, 140305730                       | 14.77±0.83 | 25.74±3.99 | <u>9.14E-03</u> |
| 62  | PCDHAC1 | 5  | 140305755, 140305757                       | 14.77±0.83 | 25.74±3.99 | <u>9.14E-03</u> |
| 63  | PCDHAC1 | 5  | 140305769                                  | 12.14±0.55 | 26.74±2.98 | <u>1.78E-06</u> |
| 64  | PCDHAC1 | 5  | 140305821                                  | 9.72±0.48  | 18.09±2.14 | <u>1.45E-05</u> |
| 65  | PCDHAC1 | 5  | 140305827                                  | 18.47±0.44 | 24.28±1.64 | <u>1.21E-04</u> |
| 66  | PCDHAC1 | 5  | 140305870                                  | 7.93±0.64  | 16.64±2.44 | <u>1.22E-04</u> |
| 67  | PCDHAC1 | 5  | 140305880, 140305889, 140305892            | 20.94±0.95 | 35.03±3.84 | <u>1.37E-04</u> |
| 68  | PCDHAC1 | 5  | 140305902, 140305905                       | 12.66±0.62 | 24.97±3.94 | <u>2.39E-04</u> |
| 69  | PCDHAC1 | 5  | 140305916, 140305919                       | 8.50±0.73  | 22.29±4.38 | <u>7.44E-04</u> |
| 70  | PCDHAC1 | 5  | 140305926                                  | 11.81±0.90 | 22.05±3.02 | <u>3.71E-04</u> |
| 71  | PCDHAC1 | 5  | 140305929, 140305931, 140305933            | 11.90±0.70 | 24.86±3.85 | <u>1.19E-04</u> |
| 72  | PCDHAC1 | 5  | 140305947                                  | 13.60±1.14 | 27.74±4.73 | <u>1.82E-03</u> |
| 73  | PCDHAC1 | 5  | 140305994                                  | 15.50±0.96 | 26.30±2.52 | <u>3.48E-05</u> |
| 74  | PRAC    | 17 | 46799645, 46799648                         | 26.96±1.00 | 51.10±3.56 | <u>1.10E-07</u> |
| 75  | PRAC    | 17 | 46799654                                   | 22.88±0.95 | 47.38±4.37 | <u>6.53E-07</u> |
| 76  | PRAC    | 17 | 46799722                                   | 16.39±0.93 | 38.45±4.47 | <u>3.25E-06</u> |
| 77  | PRAC    | 17 | 46799745                                   | 21.84±1.27 | 49.24±3.90 | <u>1.01E-07</u> |
| 78  | PRAC    | 17 | 46799755                                   | 25.52±1.03 | 47.68±2.26 | <u>4.36E-08</u> |
| 79  | TRH8    | 3  | 129693350, 129693352, 129693355, 129693358 | 12.02±0.53 | 22.85±1.89 | <u>8.78E-07</u> |
| 80  | TRH8    | 3  | 129693370                                  | 19.46±1.04 | 33.65±2.25 | <u>1.10E-05</u> |
| 81  | TRH8    | 3  | 129693406, 129693412                       | 21.79±0.78 | 40.64±1.61 | <u>1.27E-08</u> |
| 82  | TRH8    | 3  | 129693425                                  | 12.20±0.60 | 24.44±1.88 | <u>4.01E-07</u> |
| 83  | TRH8    | 3  | 129693500                                  | 13.98±0.58 | 23.03±0.87 | <u>9.44E-07</u> |
| 84  | TRH8    | 3  | 129693513                                  | 5.93±0.65  | 14.53±2.48 | <u>1.14E-04</u> |
| 85  | TRH8    | 3  | 129693518, 129693521, 129693528            | 14.06±0.69 | 29.51±1.58 | <u>5.40E-08</u> |
| 86  | TRH8    | 3  | 129693540, 129693543                       | 8.48±0.73  | 26.56±2.36 | <u>8.53E-08</u> |
| 87  | TRH8    | 3  | 129693563                                  | 7.94±0.53  | 21.74±2.52 | <u>9.64E-07</u> |
| 88  | TRH8    | 3  | 129693570, 129693574                       | 11.84±0.58 | 24.28±1.63 | <u>1.34E-07</u> |
| 89  | TRH8    | 3  | 129693586                                  | 5.27±0.45  | 15.51±1.26 | <u>4.59E-08</u> |
| 90  | TRH8    | 3  | 129693607                                  | 12.20±0.60 | 24.44±1.88 | <u>4.01E-07</u> |
| 91  | TRH8    | 3  | 129693613                                  | 4.07±0.51  | 15.08±2.10 | <u>3.06E-07</u> |
| 92  | TRH8    | 3  | 129693620                                  | 26.14±0.60 | 35.74±1.98 | <u>5.05E-06</u> |
| 93  | TRH8    | 3  | 129693628                                  | 8.80±0.58  | 18.54±1.51 | <u>8.98E-08</u> |
| 94  | TRH8    | 3  | 129693635                                  | 4.66±0.39  | 10.85±1.01 | <u>1.86E-08</u> |
| 95  | TRH8    | 3  | 129693672                                  | 11.12±0.63 | 23.10±1.91 | <u>2.52E-07</u> |
| 96  | TRH8    | 3  | 129693692                                  | 23.05±1.32 | 44.05±4.18 | <u>3.35E-05</u> |
| 97  | TRH8    | 3  | 129693698, 129693705                       | 6.01±0.72  | 15.33±2.21 | <u>6.74E-06</u> |
| 98  | SLC13A5 | 17 | 6616641, 6616644                           | 7.75±0.62  | 20.38±3.73 | <u>6.20E-06</u> |
| 99  | SLC13A5 | 17 | 6616653, 6616655, 6616657                  | 20.67±0.55 | 34.60±2.35 | <u>1.31E-07</u> |
| 100 | SLC13A5 | 17 | 6616672, 6616676                           | 18.24±0.57 | 29.51±3.83 | <u>4.79E-04</u> |
| 101 | SLC13A5 | 17 | 6616702, 6616705, 6616707                  | 9.02±0.55  | 25.32±4.17 | <u>1.10E-06</u> |
| 102 | SLC13A5 | 17 | 6616733                                    | 4.29±0.21  | 18.86±4.24 | <u>6.88E-09</u> |
| 103 | SLC13A5 | 17 | 6616751                                    | 2.17±0.40  | 13.26±3.93 | <u>2.51E-07</u> |
| 104 | SLC13A5 | 17 | 6616763, 6616768                           | 14.65±0.47 | 30.13±3.38 | <u>9.22E-08</u> |
| 105 | SLC13A5 | 17 | 6616812                                    | 12.85±0.45 | 27.89±1.67 | <u>7.27E-09</u> |
| 106 | SLC13A5 | 17 | 6616826, 6616828                           | 16.27±0.64 | 31.43±2.72 | <u>6.53E-08</u> |
| 107 | SLC13A5 | 17 | 6616851, 6616854, 6616857                  | 10.67±0.48 | 25.61±3.24 | <u>5.19E-08</u> |
| 108 | SLC13A5 | 17 | 6616867                                    | 6.86±0.72  | 20.70±3.76 | <u>2.10E-06</u> |
| 109 | SLC13A5 | 17 | 6616883, 6616888                           | 11.75±0.65 | 25.86±2.83 | <u>1.66E-06</u> |

|     |         |    |                                    |            |            |                 |
|-----|---------|----|------------------------------------|------------|------------|-----------------|
| 110 | SLC13A5 | 17 | 6616927, 6616929                   | 16.27±0.64 | 31.43±2.72 | <u>6.53E-08</u> |
| 111 | SLC13A5 | 17 | 6616949, 6616955                   | 25.24±0.97 | 38.06±2.81 | <u>6.41E-05</u> |
| 112 | SLC13A5 | 17 | 6616968, 6616973                   | 10.77±0.53 | 23.20±2.81 | <u>3.10E-07</u> |
| 113 | SLC13A5 | 17 | 6616986, 6616991                   | 23.36±0.58 | 33.88±2.86 | <u>4.46E-05</u> |
| 114 | SLC13A5 | 17 | 6617030, 6617038, 6617040, 6617044 | 20.53±0.72 | 37.68±2.32 | <u>1.15E-07</u> |
| 115 | SLC13A5 | 17 | 6617077                            | 7.74±0.61  | 25.17±4.97 | <u>1.03E-07</u> |
| 116 | SLC13A5 | 17 | 6617124                            | 23.26±1.18 | 47.00±4.00 | <u>6.53E-07</u> |
| 117 | SLC13A5 | 17 | 6617192, 6617197, 6617199, 6617206 | 26.14±1.13 | 43.03±3.79 | <u>2.28E-04</u> |
| 118 | SLC13A5 | 17 | 6617251, 6617255                   | 17.04±0.90 | 35.65±3.99 | <u>9.49E-07</u> |
| 119 | SLC13A5 | 17 | 6617287, 6617291                   | 20.64±0.89 | 36.85±2.77 | <u>1.72E-07</u> |
| 120 | SLC13A5 | 17 | 6617300, 6617305                   | 22.68±1.01 | 38.87±2.03 | <u>4.70E-07</u> |
| 121 | SLC13A5 | 17 | 6617318                            | 19.86±1.17 | 37.90±3.70 | <u>5.08E-06</u> |
| 122 | SLC13A5 | 17 | 6617322                            | 14.47±1.02 | 23.43±2.38 | <u>6.20E-03</u> |
| 123 | SLC13A5 | 17 | 6617368, 6617370                   | 22.35±1.28 | 39.23±3.11 | <u>3.28E-05</u> |
| 124 | SLC13A5 | 17 | 6617382                            | 15.04±0.94 | 32.82±3.39 | <u>1.24E-06</u> |
| 125 | SLC13A5 | 17 | 6617392                            | 17.75±0.99 | 31.33±2.79 | <u>1.15E-05</u> |
| 126 | SLC13A5 | 17 | 6617398, 6617402, 6617405          | 12.05±0.64 | 36.96±6.54 | <u>7.33E-07</u> |
| 127 | SLC13A5 | 17 | 6617415                            | 19.66±1.66 | 48.94±6.41 | <u>1.06E-05</u> |
| 128 | SLC13A5 | 17 | 6617421, 6617423                   | 23.96±1.28 | 44.10±3.65 | <u>1.63E-07</u> |
| 129 | SLC13A5 | 17 | 6617456                            | 21.09±1.61 | 42.63±4.30 | <u>2.72E-06</u> |
| 130 | SLC13A5 | 17 | 6617466, 6617470                   | 17.14±1.06 | 37.53±3.13 | <u>2.11E-07</u> |
| 131 | SLC13A5 | 17 | 6617523                            | 62.77±2.55 | 75.39±5.03 | <u>1.49E-02</u> |
| 132 | SLC13A5 | 17 | 6617538                            | 45.02±1.26 | 50.99±2.70 | <u>2.09E-02</u> |
| 133 | SLC13A5 | 17 | 6617559                            | 45.02±1.26 | 50.99±2.70 | <u>2.09E-02</u> |
| 134 | SLC13A5 | 17 | 6617580                            | 49.89±2.25 | 66.70±3.08 | <u>7.66E-04</u> |
| 135 | SLC13A5 | 17 | 6617595, 6617597                   | 56.81±1.25 | 72.50±1.47 | <u>2.35E-07</u> |
| 136 | ZNF671  | 19 | 58238711                           | 7.69±0.34  | 27.48±4.78 | <u>2.46E-06</u> |
| 137 | ZNF671  | 19 | 58238717                           | 11.68±0.41 | 25.71±4.28 | <u>7.93E-06</u> |
| 138 | ZNF671  | 19 | 58238740                           | 4.30±0.34  | 22.57±5.55 | <u>1.09E-06</u> |
| 139 | ZNF671  | 19 | 58238760, 58238762, 58238764       | 5.02±0.36  | 26.55±5.77 | <u>2.28E-06</u> |
| 140 | ZNF671  | 19 | 58238771                           | 4.90±0.38  | 26.26±6.22 | <u>2.97E-06</u> |
| 141 | ZNF671  | 19 | 58238780                           | 10.89±0.40 | 25.45±4.26 | <u>5.17E-08</u> |
| 142 | ZNF671  | 19 | 58238791, 58238797, 58238799       | 5.13±0.36  | 24.56±6.47 | <u>5.82E-05</u> |
| 143 | ZNF671  | 19 | 58238810                           | 5.12±0.30  | 23.08±5.70 | <u>3.09E-07</u> |
| 144 | ZNF671  | 19 | 58238816                           | 11.68±0.41 | 25.71±4.28 | <u>7.93E-06</u> |
| 145 | ZNF671  | 19 | 58238823, 58238828                 | 3.59±0.22  | 14.71±3.40 | <u>2.18E-06</u> |
| 146 | ZNF671  | 19 | 58238832                           | 6.47±0.44  | 27.74±5.78 | <u>1.97E-06</u> |
| 147 | ZNF671  | 19 | 58238850                           | 8.33±0.47  | 29.83±5.93 | <u>3.40E-07</u> |
| 148 | ZNF671  | 19 | 58238870, 58238872, 58238877       | 13.78±0.30 | 24.95±4.04 | <u>2.08E-04</u> |
| 149 | ZNF671  | 19 | 58238903, 58238905                 | 12.29±0.94 | 35.04±5.67 | <u>1.85E-06</u> |
| 150 | ZNF671  | 19 | 58238928                           | 6.55±0.36  | 27.52±5.07 | <u>2.38E-08</u> |
| 151 | ZNF671  | 19 | 58238941                           | 7.69±0.34  | 27.48±4.78 | <u>2.46E-06</u> |
| 152 | ZNF671  | 19 | 58238954                           | 10.89±0.40 | 25.45±4.26 | <u>5.17E-08</u> |
| 153 | ZNF671  | 19 | 58238987                           | 10.89±0.40 | 25.45±4.26 | <u>5.17E-08</u> |
| 154 | ZNF671  | 19 | 58239003                           | 11.68±0.41 | 25.71±4.28 | <u>7.93E-06</u> |
| 155 | ZNF671  | 19 | 58239012                           | 6.97±0.28  | 19.12±5.30 | <u>6.25E-08</u> |
| 156 | ZNF671  | 19 | 58239027                           | 7.85±0.26  | 20.50±5.15 | <u>9.26E-07</u> |
| 157 | WNT3A   | 1  | 228195591                          | 1.78±0.24  | 5.00±1.20  | <u>1.16E-03</u> |
| 158 | WNT3A   | 1  | 228195628, 228195638               | 23.54±1.00 | 37.86±3.41 | <u>4.99E-05</u> |
| 159 | WNT3A   | 1  | 228195659, 228195661, 228195666    | 17.60±1.11 | 27.25±3.69 | <u>4.64E-03</u> |
| 160 | WNT3A   | 1  | 228195688                          | 16.72±0.46 | 31.26±3.04 | <u>1.08E-07</u> |
| 161 | WNT3A   | 1  | 228195722                          | 16.72±0.46 | 31.26±3.04 | <u>1.08E-07</u> |
| 162 | WNT3A   | 1  | 228195779                          | 16.72±0.46 | 31.26±3.04 | <u>1.08E-07</u> |
| 163 | WNT3A   | 1  | 228195794                          | 13.88±0.67 | 26.19±4.15 | <u>9.78E-06</u> |
| 164 | WNT3A   | 1  | 228195848                          | 11.30±0.98 | 25.45±3.85 | <u>7.34E-05</u> |
| 165 | WNT3A   | 1  | 228195859                          | 9.04±0.86  | 25.67±4.62 | <u>2.80E-05</u> |
| 166 | KHDRBS2 | 6  | 62996200                           | 7.18±0.63  | 16.86±2.71 | <u>9.29E-05</u> |

|     |         |    |                                        |            |            |                 |
|-----|---------|----|----------------------------------------|------------|------------|-----------------|
| 167 | KHDRBS2 | 6  | 62996242                               | 15.90±1.08 | 24.64±2.83 | <u>1.02E-03</u> |
| 168 | KHDRBS2 | 6  | 62996255, 62996265, 62996267           | 22.04±0.91 | 32.71±3.21 | <u>6.87E-04</u> |
| 169 | KHDRBS2 | 6  | 62996290                               | 15.86±0.80 | 24.71±2.74 | <u>6.04E-04</u> |
| 170 | KHDRBS2 | 6  | 62996304, 62996306                     | 24.88±1.26 | 33.79±3.17 | <u>8.40E-03</u> |
| 171 | KHDRBS2 | 6  | 62996321                               | 20.62±0.92 | 29.14±2.40 | <u>2.42E-03</u> |
| 172 | KHDRBS2 | 6  | 62996324, 62996327                     | 16.21±0.82 | 27.07±2.74 | <u>1.56E-04</u> |
| 173 | KHDRBS2 | 6  | 62996334                               | 20.62±0.92 | 29.14±2.40 | <u>2.42E-03</u> |
| 174 | KHDRBS2 | 6  | 62996380, 62996383, 62996385, 62996387 | 24.30±1.13 | 29.79±3.18 | 1.05E-01        |
| 175 | KHDRBS2 | 6  | 62996401, 62996403                     | 16.21±0.82 | 27.07±2.74 | <u>1.56E-04</u> |
| 176 | KHDRBS2 | 6  | 62996414                               | 16.42±0.94 | 28.43±3.06 | <u>9.86E-05</u> |
| 177 | KHDRBS2 | 6  | 62996436, 62996440                     | 22.24±0.95 | 30.43±2.67 | <u>3.02E-03</u> |
| 178 | KHDRBS2 | 6  | 62996456, 62996458, 62996463, 62996467 | 20.69±1.11 | 27.86±3.12 | <u>1.33E-02</u> |
| 179 | KHDRBS2 | 6  | 62996478                               | 16.37±0.93 | 21.71±2.18 | 5.03E-02        |
| 180 | KHDRBS2 | 6  | 62996485, 62996487                     | 14.76±0.93 | 24.93±3.43 | <u>8.65E-04</u> |
| 181 | KHDRBS2 | 6  | 62996561, 62996564, 62996566           | 21.58±1.14 | 28.64±3.58 | <u>3.66E-02</u> |
| 182 | ASCL2   | 11 | 2292525                                | 10.10±1.31 | 26.29±5.81 | <u>7.04E-03</u> |
| 183 | ASCL2   | 11 | 2292538                                | 16.46±0.82 | 35.93±3.50 | <u>3.18E-06</u> |
| 184 | ASCL2   | 11 | 2292542, 2292544                       | 25.37±0.71 | 40.00±2.11 | <u>8.35E-07</u> |
| 185 | ASCL2   | 11 | 2292558                                | 16.83±0.69 | 27.64±2.17 | <u>2.36E-05</u> |
| 186 | ASCL2   | 11 | 2292588                                | 24.73±1.18 | 40.36±3.32 | <u>2.56E-04</u> |
| 187 | ASCL2   | 11 | 2292602                                | 19.17±0.88 | 32.43±2.33 | <u>1.54E-05</u> |
| 188 | ASCL2   | 11 | 2292625                                | 2.39±0.18  | 7.21±1.69  | <u>1.66E-03</u> |
| 189 | ASCL2   | 11 | 2292636                                | 6.33±0.61  | 16.93±2.69 | <u>1.19E-04</u> |
| 190 | ASCL2   | 11 | 2292658, 2292663                       | 19.77±0.54 | 29.86±2.03 | <u>1.48E-05</u> |
| 191 | ASCL2   | 11 | 2292701, 2292703                       | 35.23±0.89 | 49.43±3.24 | <u>3.52E-06</u> |
| 192 | ASCL2   | 11 | 2292751                                | 43.63±1.70 | 43.79±4.25 | 9.26E-01        |
| 193 | ASCL2   | 11 | 2292764                                | 24.61±0.78 | 30.79±2.72 | <u>2.10E-02</u> |

<sup>a</sup>National Center for Biotechnology Information (NCBI) Database (Genome Build 37). <sup>b</sup>Mann-Whitney *U* test. *P* values of <0.05 are underlined.
