# Supplementary material for: Prognostication of patients with clear cell renal cell carcinomas based on quantification of DNA methylation levels of CpG island methylator phenotype marker genes
Source: PubMed Central journal article supplement (PMC4216836; doi:10.1186/1471-2407-14-772), 2014-10-20
Supplement: 12885_2014_4959_MOESM9_ESM.pdf [file 12885_2014_4959_MOESM9_ESM.pdf]

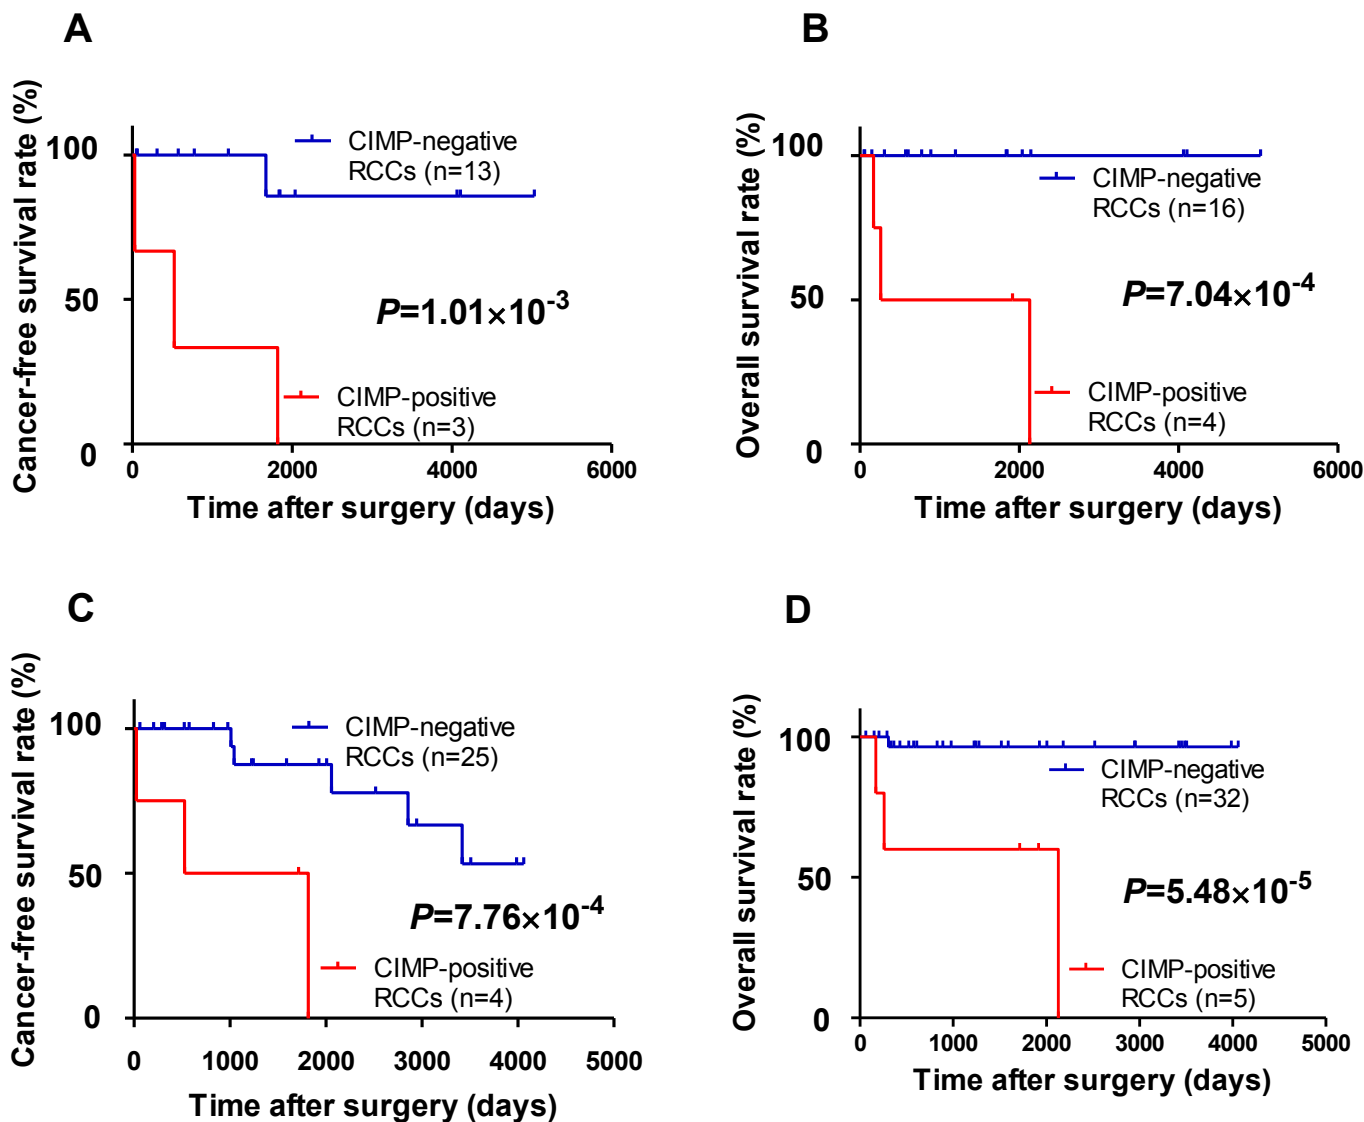

**Figure S3.** Kaplan–Meier survival curves of patients with CIMP-positive and -negative high-grade (grades 3 and 4) and high-stage (stages III and IV) clear cell renal cell carcinomas (ccRCCs) in the validation cohort. The cancer-free (Panel **A**,  $P=1.01 \times 10^{-3}$ ) and overall (Panel **B**,  $P=7.04 \times 10^{-4}$ ) survival rates of patients with CIMP-positive grade 3/4 ccRCCs were significantly lower than those of patients with CIMP-negative grade 3/4 ccRCCs (log-rank test). The cancer-free (Panel **C**,  $P=7.76 \times 10^{-4}$ ) and overall (Panel **D**,  $P=5.48 \times 10^{-5}$ ) survival rates of patients with CIMP-positive stage III/IV ccRCCs were significantly lower than those of patients with CIMP-negative stage III/IV ccRCCs (log-rank test). Patients who underwent curative resection are included in panels **A** and **C**.
